# Supplementary material
Source: PubMed Central journal article supplement (PMC5649414)
Supplement: Supp_Fig1.pdf [file Supp_Fig1.pdf]

## Supplementary Data

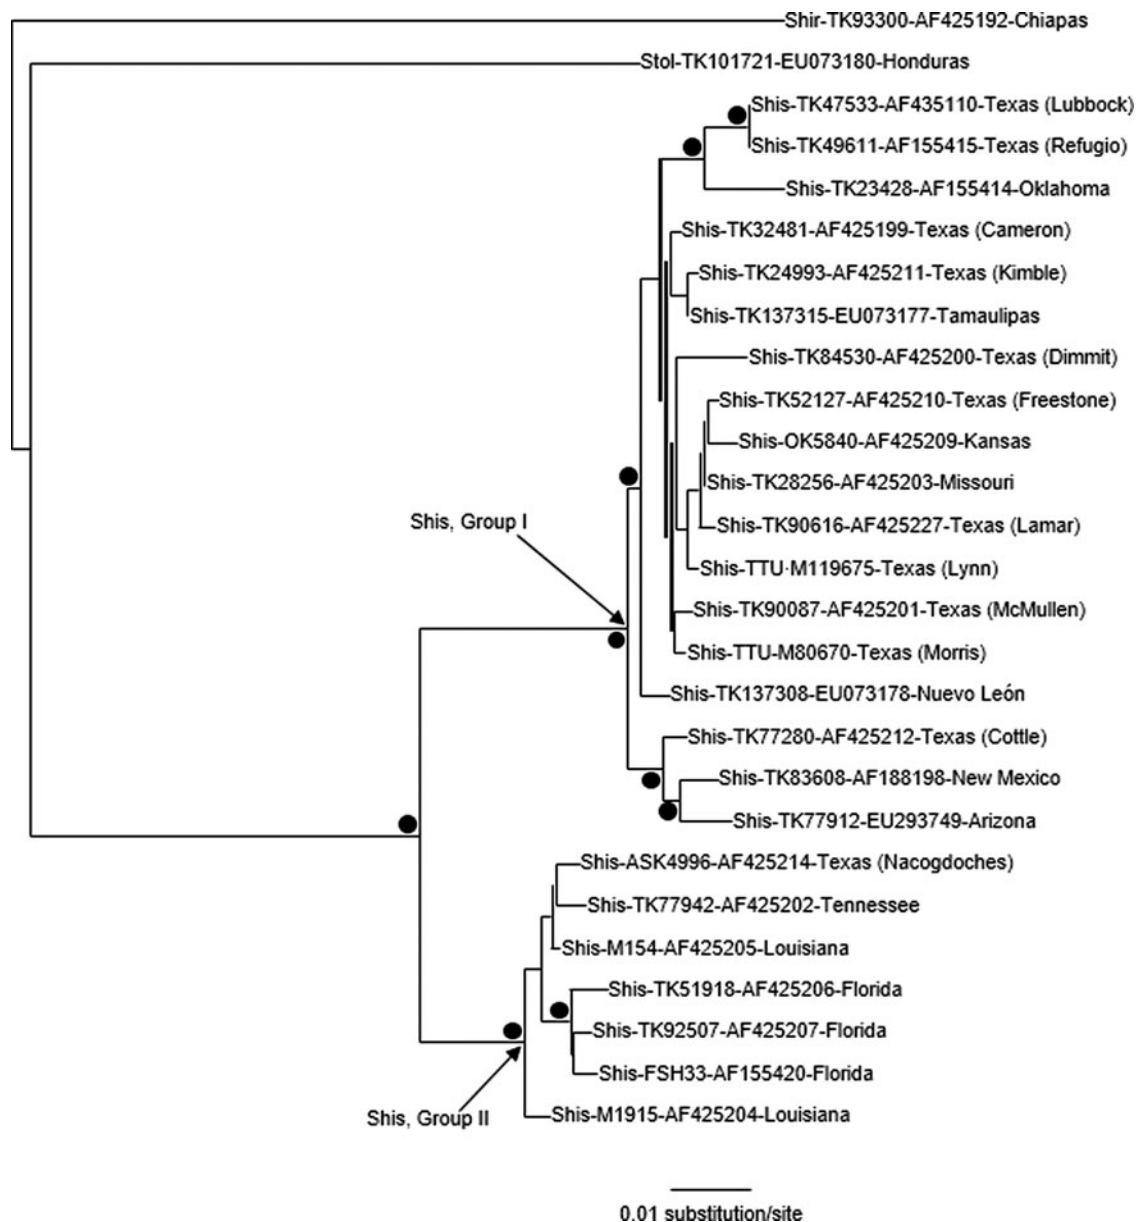

**SUPPLEMENTARY FIG. S1.** Phylogenetic relationships among cotton rats (*Sigmodon* spp.) based on Bayesian analyses of cytochrome *b* gene sequences. Branch labels include species, voucher specimen identifier, GenBank accession number, state, or country (county, Texas only). *Shir*, *Sigmodon hirsutus*; *Stol*, *S. toltecus*; *Shis*, *S. hispidus*. Chiapas, Nuevo León, and Tamaulipas are states in Mexico. The length of the scale bar is equivalent to 0.1 substitution per site, a black dot (●) indicates that the clade probability values were  $\geq 95.0$ , and *S. hirsutus* TX93300 was the designated out-group.
